# Supplementary material for: Uncovering the Complexity of Care Networks – Towards a Taxonomy of Collaboration Complexity in Homecare
Source: Springer Nature journal article supplement (doi:10.1007/s10606-022-09433-8), 2022-06-08

Supplementary Material: Appendix 4:

Article title:

## **Uncovering the Complexity of Care Networks – Towards a Taxonomy of Collaboration Complexity in Homecare**

Journal name: Computer Supported Cooperative Work

Authors:

Madeleine Renyi<sup>1,2</sup>, Petra Gaugisch<sup>3</sup>, Alexandra Hunck<sup>3</sup>, Stefan Strunck<sup>3</sup>, Christophe Kunze<sup>1</sup>, Frank Teuteberg<sup>2</sup>

<sup>1</sup>Technology and Inclusion Lab, Furtwangen University, Robert-Gerwig-Platz 1, 78120 Furtwangen, Germany  
{madeleine.renyi; christophe.kunze}@hs-furtwangen.de

<sup>2</sup>Institute for Information Management and Information Systems Engineering, Osnabrück University, Katharinenstr. 1, 49069 Osnabrück, Germany  
{mrenyi; frank.teuteberg}@uni-osnabrueck.de}

<sup>3</sup>Fraunhofer Institute for Industrial Engineering (IAO), Nobelstr. 12, 70569 Stuttgart, Germany  
{petra.gaugisch; stefan.strunck}@iao.fraunhofer.de  
alexandra.hunck@googlemail.com

### **Corresponding Author:**

Madeleine Renyi

Affiliation bound contact details:

Address: Robert-Gerwig-Platz 1, 78120 Furtwangen, Germany

Email: [madeleine.renyi@hs-furtwangen.de](mailto:madeleine.renyi@hs-furtwangen.de)

Permanent contact details:

Email: [info@madeleinerenyi.de](mailto:info@madeleinerenyi.de)

## Supplementary Material

Appendix 4:

Document Title: Stakeholder cards

Description: care recipient, informal actor, professional or semiprofessional actor, professional institution

Care recipient

gender:

- male
- female
- diverse

age in years: \_\_\_\_\_

chronic diseases:

- dementia
- Parkinson
- Diabetes
- other: \_\_\_\_\_
- other: \_\_\_\_\_
- other: \_\_\_\_\_
- unknown

restrictions:

motor:

\_\_\_\_\_

cognitive:

\_\_\_\_\_

verbal:

\_\_\_\_\_

other:

\_\_\_\_\_

available technologies

1. devices
  - smartphones
  - tablet
  - PC
2. internet
  - LAN
  - WIFI
  - mobile data

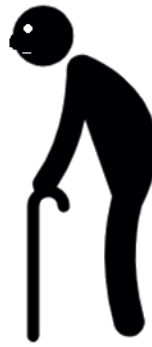

residential situation:

- living alone
- living alone, but with support in the same house
- living together with a support person
- living together with several support persons:
- number of persons living in the household: \_\_\_\_\_ persons
- apartment in an assisted living facility
- room in a retirement or nursing home
- shared apartment
- other form of living: \_\_\_\_\_

need of care:

1. need of care since:
  - not yet at all
  - no longer than 3 months
  - 3 - 6 months
  - 7 - 12 months
  - longer than 12 months
2. care level:
  - no care level
  - care level 1
  - care level 2
  - care level 3
  - care level 4
  - care level 5

## Informal actor

relationship to care recipient

- |                                       |                                            |                                                |
|---------------------------------------|--------------------------------------------|------------------------------------------------|
| <input type="radio"/> mother / father | <input type="radio"/> brother              | <input type="radio"/> volunteer <b>without</b> |
| <input type="radio"/> son             | <input type="radio"/> spouse / partner     | institutional                                  |
| <input type="radio"/> daughter        | <input type="radio"/> related by marriage: | connection                                     |
| <input type="radio"/> grandson        | _____                                      | <input type="radio"/> other:                   |
| <input type="radio"/> granddaughter   | <input type="radio"/> friend               | _____                                          |
| <input type="radio"/> sister          | <input type="radio"/> neighbor             |                                                |

age in years: \_\_\_\_\_

occupation:

- full time
- part time
- not working
- pensioners
- home office
- unknown

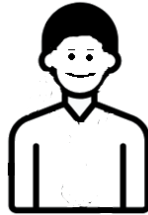

distance to care recipient:

- same neighborhood / residence
- < 10 km
- 11 - 50 km
- 51 - 100 km
- > 100 km

roles (multiple selection - **the three main activities**):

- no participation / care activity
- visits / psychosocial care (calls, conversations, ...)
- domestic support (e.g. shopping, cleaning, laundry, cooking)
- organization of nursing activities
- basic nursing / "body care" (e.g. washing, shaving, dressing, undressing)
- support with basic needs (e.g. going to toilet, food intake)
- craft activities (e.g. gardening, animal care)
- transport services e.g. to doctors or activities
- visiting service providers (e.g. supermarket, pharmacy)
- accompaniment to service providers (e.g. doctor, therapist, hairdresser)
- drug administration
- mobilization of the care recipient
- changing compression stockings, catheters, bandages
- other: \_\_\_\_\_

frequency of activity:

- several times á day
- daily
- several times á week
- weekly
- sporadic / occasional
- other: \_\_\_\_\_

expenditure of time for care activities:

- full time
- part time
- on demand / free time
- other: \_\_\_\_\_

available technologies

1. devices
  - smartphones
  - tablet
  - PC
2. internet
  - LAN
  - WIFI
  - mobile data

**Professional or semiprofessional actor**relationship to care recipient

- volunteer with institutional connection
- prof. service
  - care provider
  - physician
  - medical specialist: \_\_\_\_\_(special field)
  - physiotherapy
  - other: \_\_\_\_\_

age groups

- <30 years
- 31 - 40 years
- 41 - 50 years
- 51 - 60 years
- > 60 years
- unknown

available technologies:

1. devices
  - smartphones
  - tablet
  - PC
2. internet
  - LAN
  - WIFI
  - mobile data

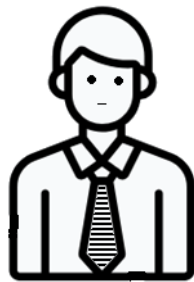distance to care recipient (distance of the office / branches / practice rooms / ... to the care recipient)

- irrelevant: house visits / telephone contact
- same neighborhood / residence
- < 10 km
- 11 - 50 km
- 51 - 100 km
- > 100 km

roles (multiple selection - **the three main activities**):

- no participation / care activity
- visits / psychosocial care (calls, conversations, ...)
- domestic care (e.g. shopping, cleaning, laundry, cooking)
- organization of nursing activities
- basic care / body care (e.g. washing, shaving, dressing, undressing)
- support with basic needs (e.g. going to toilet, food intake)
- craft activities (e.g. gardening, animal care)
- transport services e.g. to doctors or activities
- visiting service providers (e.g. supermarket, pharmacy)
- accompaniment to service providers (e.g. doctor, therapist, hairdresser)
- drug administration
- mobilization of the care recipient
- changing compression stockings, catheters, bandages
- other: \_\_\_\_\_

frequency of activity:

- several times á day
- daily
- several times á week
- weekly
- sporadic / occasional
- other: \_\_\_\_\_

expenditure of time for care activities:

- full time
- part time
- on demand / free time
- other: \_\_\_\_\_

### Professional institution relationship to care recipient

- nursing service
- physician
- neighborhood help association
- pharmacy
- medical specialist:  
\_\_\_\_\_
- (special field)
- physiotherapy
- other: \_\_\_\_\_

distance to care recipient (distance of the office / branches / practice rooms / ... to the care recipient)

- irrelevant: house visits / telephone contact
- same neighborhood / residence
- < 10 km
- 11 - 50 km
- 51 - 100 km
- > 100 km

roles (multiple selection - **the three main activities**):

- no participation / care activity
- visits / psychosocial care (calls, conversations, ...)
- domestic care (e.g. shopping, cleaning, laundry, cooking)
- organization of nursing activities
- basic care / body care (e.g. washing, shaving, dressing, undressing)
- support with basic needs (e.g. going to toilet, food intake)
- craft activities (e.g. gardening, animal care)
- transport services e.g. to doctors or activities
- visiting service providers (e.g. supermarket, pharmacy)
- accompaniment to service providers (e.g. doctor, therapist, hairdresser)
- drug administration
- mobilization of the care recipient
- changing compression stockings, catheters, bandages
- other: \_\_\_\_\_

frequency of activity:

- several times á day
- daily
- several times á week
- weekly
- sporadic / occasional
- other: \_\_\_\_\_

expenditure of time for care activities:

\_\_\_\_\_

available technologies

3. devices
  - smartphones
  - tablet
  - PC
4. Internet
  - LAN
  - WIFI
  - mobile data

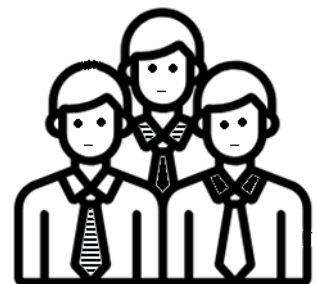

Supplement: MOESM4 [file 23141948]
