# Supplementary material for: Uncovering the Complexity of Care Networks – Towards a Taxonomy of Collaboration Complexity in Homecare
Source: Springer Nature journal article supplement (doi:10.1007/s10606-022-09433-8), 2022-06-08
Supplement: MOESM2 [file 23141948]

Supplementary Material: Appendix 2:

Article title:

## **Uncovering the Complexity of Care Networks – Towards a Taxonomy of Collaboration Complexity in Homecare**

Journal name: Computer Supported Cooperative Work

Authors:

Madeleine Renyi<sup>1,2</sup>, Petra Gaugisch<sup>3</sup>, Alexandra Hunck<sup>3</sup>, Stefan Strunck<sup>3</sup>, Christophe Kunze<sup>1</sup>, Frank Teuteberg<sup>2</sup>

<sup>1</sup>Technology and Inclusion Lab, Furtwangen University, Robert-Gerwig-Platz 1, 78120 Furtwangen, Germany  
{madeleine.renyi; christophe.kunze}@hs-furtwangen.de

<sup>2</sup>Institute for Information Management and Information Systems Engineering, Osnabrück University, Katharinenstr. 1, 49069 Osnabrück, Germany  
{mrenyi; frank.teuteberg}@uni-osnabrueck.de}

<sup>3</sup>Fraunhofer Institute for Industrial Engineering (IAO), Nobelstr. 12, 70569 Stuttgart, Germany  
{petra.gaugisch; stefan.strunck}@iao.fraunhofer.de  
alexandra.hunck@googlemail.com

### **Corresponding Author:**

Madeleine Renyi

Affiliation bound contact details:

Address: Robert-Gerwig-Platz 1, 78120 Furtwangen, Germany

Email: [madeleine.renyi@hs-furtwangen.de](mailto:madeleine.renyi@hs-furtwangen.de)

Permanent contact details:

Email: [info@madeleinerenyi.de](mailto:info@madeleinerenyi.de)

## Supplementary Material

Appendix 2:

Document Title: Das KomZiP-Tool – Ein Tool zur Erfassung der **Komplexität** der **Zusammenarbeit in Pflegenetzwerken**

Description: German version of the practical guide developed out of the presented taxonomy

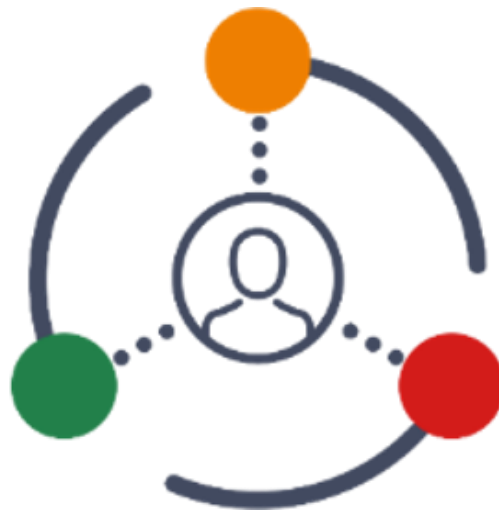

# Das KomZiP-Tool

Ein Tool zur Erfassung der **Komplexität** der  
**Zusammenarbeit in Pflegenetzwerken**

Autoren:

| Institution           | Nachname, Vorname |
|-----------------------|-------------------|
| Hochschule Furtwangen | Renyi, Madeleine  |
| Fraunhofer IAO        | Gaugisch, Petra   |
|                       | Hunck, Alexandra  |

Entstanden im Rahmen des Forschungsprojekts EIKI  
Gefördert durch das Ministerium für Soziales und Integration Baden-Württemberg

Version: Stand 26.03.2021

## Um was geht es?

An der Versorgung von Pflege- oder Unterstützungsbedürftigen wirken oft mehrere verschiedenartige Akteure mit. Diese bilden ein individuelles Pflegenetzwerk. Die Netzwerke von Pflegebedürftigen sind unterschiedlich z.B. hinsichtlich ihrer Größe, ihrer Zusammensetzung und ihrer Aufgabentrennung. Mit Hilfe des KomZiP-Tools soll die Komplexität der Zusammenarbeit in einem Pflegenetzwerk erfasst werden. Der Fokus bei der Analyse der Zusammenarbeit liegt auf der Kommunikation und Organisation in den Netzwerken.

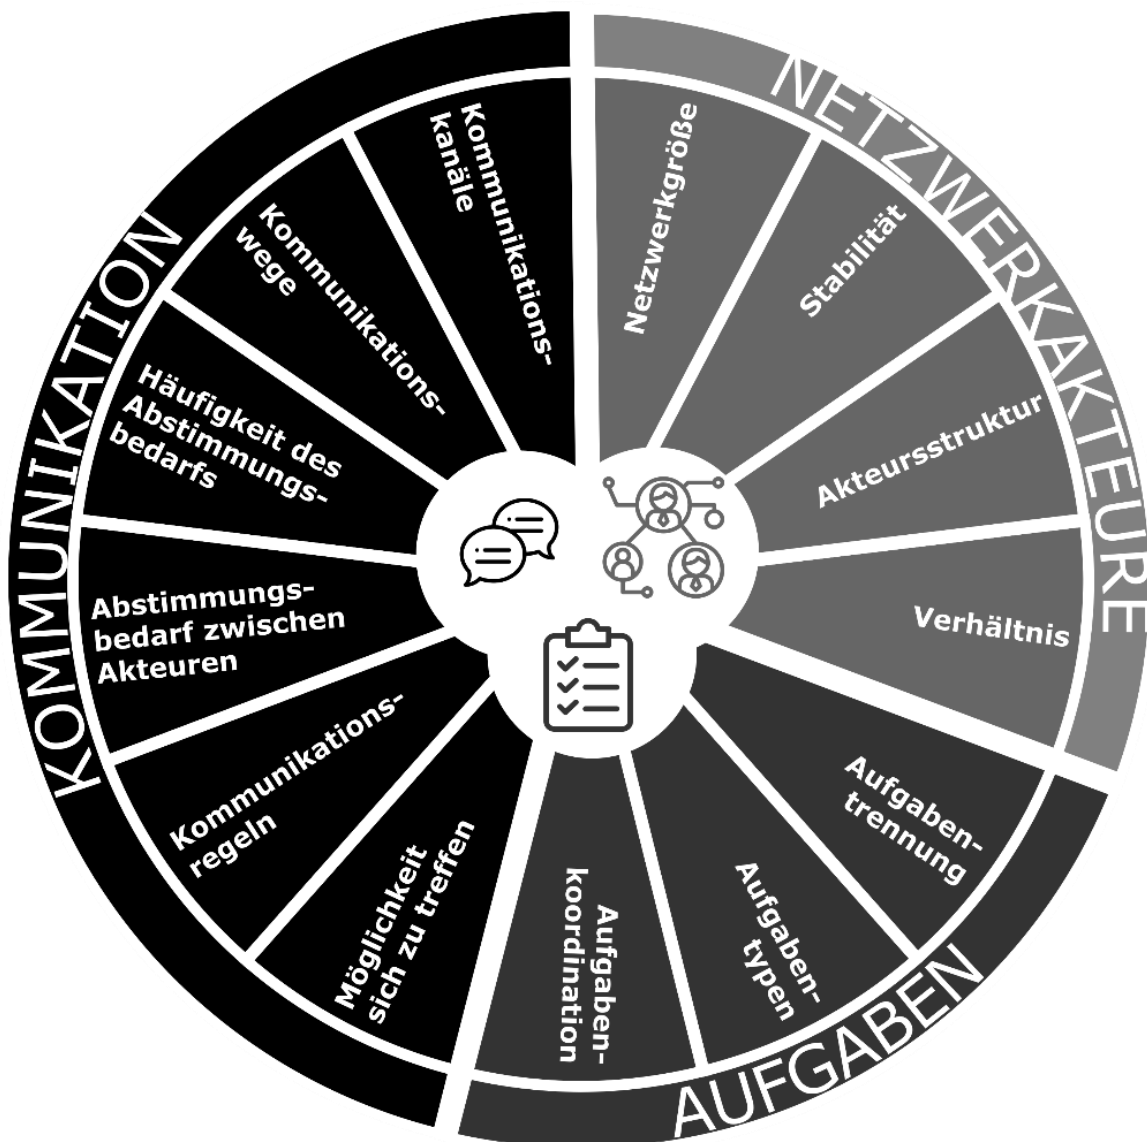

Abbildung 1: Visualisierung des KomZiP-Tools zur Erfassung der Komplexität der Zusammenarbeit in Pflegenetzwerken

## Wofür soll das Tool eingesetzt werden?

Mit Hilfe des Tools können Pflegenetzwerke analysiert werden. Hierbei werden Zusammenhänge der Zusammenarbeit in Pflegenetzwerken verständlich gemacht. Ebenso unterstützt das Tool dabei gezielt Maßnahmen abzuleiten. So kann die Zusammenarbeit der Akteure im individuellen Pflegenetzwerk erleichtert werden.

## Wie funktioniert das Tool?

Das Tool beinhaltet 13 Merkmale, die Einfluss auf die Kommunikation und Organisation im Pflegenetzwerk haben. Diese lassen sich unterteilen in Merkmale zu den Netzwerkakteuren, den Aufgaben sowie der Kommunikation. Abbildung 1 zeigt eine Visualisierung der Zusammenhänge der Merkmale.

Mit Hilfe des Tools werden die Merkmale hinsichtlich ihrer Komplexität in „einfach“, „kompliziert“, oder „komplex“ eingeteilt. Am Ende können die Komplexitätsgrade der einzelnen Merkmale in ein Spinnennetz-Diagramm eingetragen werden. Dadurch entsteht ein Überblick über die Komplexität der Kommunikation und Organisation in einem Pflegenetzwerk.

## Wer kann das Tool einsetzen?

Das Tool eignet sich für alle, die Interesse an Pflegenetzwerken haben und verstehen möchten wie die Zusammenarbeit in Pflegenetzwerken funktioniert. Dies können zum Beispiel ambulante Pflegedienste sein, die die Netzwerke ihrer Kunden in der Kommunikation und Organisation unterstützen möchten. Auch rein informelle Netzwerke, wie z.B., wenn sich ausschließlich Familienmitglieder und Freunde um eine unterstützungsbedürftige Person kümmern, können ihre Zusammenarbeit abbilden und verbessern. Auch Anbieter von Softwarelösungen, die verstehen möchten, wie die Kommunikation in Pflegenetzwerken funktioniert, können von dem Tool profitieren. Sie können zielgerichtete Software-Unterstützung für Netzwerke entwickeln.

## Wer hat das Tool entwickelt?

Das Tool ist im Rahmen des Forschungsprojektes »EIKI« entstanden. Das Projekt wird vom Ministerium für Soziales und Integration Baden-Württemberg aus Mitteln des Landes Baden-Württemberg von 2018 bis 2021 gefördert. Entwickelt wurde das Tool durch eine Kooperation der Hochschule Furtwangen und dem Fraunhofer IAO.

## An wen kann ich mich bei Fragen wenden?

Bei Fragen, Feedback und Anregungen wenden Sie sich gerne an folgende Ansprechpersonen:

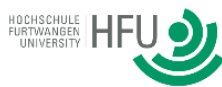

Hochschule Furtwangen (HFU)  
Instituts Mensch, Technik und Teilhabe

Robert-Gerwig-Platz 1  
78120 Furtwangen  
Deutschland

[www.mensch-technik-teilhabe.de](http://www.mensch-technik-teilhabe.de)  
[www.hs-furtwangen.de](http://www.hs-furtwangen.de)

Ansprechpartnerin:  
Madeleine Renyi  
Email: [madeleine.renyi@hs-furtwangen.de](mailto:madeleine.renyi@hs-furtwangen.de)

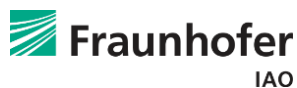

Fraunhofer-Institut für Arbeitswirtschaft  
und Organisation (IAO)  
Team Cognitive Environments

Nobelstraße 12  
70569 Stuttgart  
Deutschland

[www.iao.fraunhofer.de](http://www.iao.fraunhofer.de)

Ansprechpartnerin:  
Petra Gaugisch  
Telefon: +49 711 970 5147  
Email:  
[petra.gaugisch@iao.fraunhofer.de](mailto:petra.gaugisch@iao.fraunhofer.de)

# Anleitung zur Anwendung des KomZiP-Tools

1. **Erfassen Sie das Netzwerk** sowie die Zusammenarbeit der Netzwerkmitglieder.  
Orientieren Sie sich dafür an folgenden **Leitfragen**:
  - a) Wer ist alles in dem Netzwerk beteiligt? Wie viele Akteure spielen eine Rolle? Welche Arten von Akteuren sind beteiligt?
    - Informell Pflegende (z.B. Familie, Freunde)?
    - Semi-professionell Pflegende (z.B. Nachbarschaftshilfe)?
    - Professionell Pflegende (z.B. Pflegedienst, Arzt)?
    - Nicht-menschliche Akteure (z.B. Technik, Haustiere)?
  - b) Welche Aufgaben übernehmen die einzelnen Akteure?
  - c) Wie oft übernehmen die Akteure Aufgaben im Netzwerk?
  - d) In welcher Entfernung zur pflegebedürftigen Person leben bzw. arbeiten die Akteure?
  - e) Wie kommunizieren die Akteure untereinander? Wie oft sprechen sie sich ab?
  - f) Seit wann besteht das Netzwerk? Wie oft wechseln Akteure im Netzwerk?
  - g) Wie gut ist das Verhältnis unter den Akteuren?
  
2. **Bewerten Sie die Komplexität** der Zusammenarbeit in Ihrem Netzwerk **für die Merkmale 1-13** in beliebiger Reihenfolge.
  - a) Lesen Sie zunächst die Beschreibung des Merkmals durch.
  - b) Unter der Beschreibung des Merkmals sehen Sie, auf welche Akteure des Netzwerks sich das Merkmal bezieht. Dies sind entweder alle Akteure im Netzwerk oder nur die Akteure, die im Alltag unterstützen (Alltagsakteure). Alltagsakteure bringen sich täglich bis mindestens einmal wöchentlich ein. Sie sind somit sehr wichtig für das Netzwerk. Sie können informell (z.B. Familie, Freunde), semi-professionell (z.B. Nachbarschaftshelfer), oder professionell (professionell Pflegende, Technik) sein.
  - c) Vergeben Sie danach für jedes Merkmal einen Komplexitätsgrad. Stufen Sie dazu jedes Merkmal als „einfach“, „kompliziert“ oder „komplex“ ein. Betrachtet wird immer die Auswirkung auf die Zusammenarbeit, d.h. die Kommunikation und Organisation je Merkmal.
  
3. Fassen Sie die Komplexität der einzelnen Merkmale im **Spinnennetz-Diagramm** auf der letzten Seite zusammen. So erhalten Sie einen Überblick über die Komplexität der Zusammenarbeit im Netzwerk. Dadurch sehen Sie auf einen Blick, wie komplex die Merkmale in Ihrem Netzwerk ausgeprägt sind. Setzen Sie sich mit den Konsequenzen

der Komplexität der Zusammenarbeit in Ihrem Netzwerk auseinander, suchen Sie den Diskurs mit anderen Netzwerkakteuren und wenn möglich beschließen Sie gemeinschaftlich Maßnahmen zur Erleichterung der Zusammenarbeit im Netzwerk.

Verantwortung für die Versorgung einer anderen Person zu übernehmen ist ein ehrenwertes Unterfangen. Sie leisten unverzichtbare Arbeit. Wir hoffen Sie darin mit diesem Werkzeug unterstützen zu können.

Wir wünschen Ihnen spannungsfreie, klare, verlässliche Zusammenarbeit in Ihrem Netzwerk.

Viel Erfolg!



# 1. Netzwerkgröße

## **Beschreibung des Merkmals «Netzwerkgröße»:**

Ein Akteur und der Pflegebedürftige selbst bilden das kleinste mögliche Netzwerk. Je mehr Akteure in einem Netzwerk involviert sind, desto komplizierter ist die Zusammenarbeit. Die Größe des Netzwerks beeinflusst somit die Komplexität der Zusammenarbeit in Pflegenetzwerken.

## **Zu berücksichtigen bei der Bewertung sind die Alltagsakteure.**

**Beispiel 1 (einfach):** Das Netzwerk von Frau A besteht aus ihr und ihrer Tochter. Die Zusammenarbeit im Netzwerk von Frau A ist einfach, da sich alles nur zwischen den Beiden abspielt.

**Beispiel 2 (kompliziert):** Das Netzwerk von Frau B besteht aus ihrer Tochter, dem Schwiegersohn und ihren zwei Enkeln. Die Aufgaben sind auf die Akteure verteilt. Diese müssen sich untereinander absprechen und Informationen weitergeben. Die Zusammenarbeit ist somit kompliziert.

**Beispiel 3 (komplex):** Das Netzwerk von Frau C ist sehr groß. Dazu gehört ihre Tochter, der Schwiegersohn, ihre beiden Enkel, ein ambulanter Pflegedienst und ein Physiotherapeut. Die Anzahl an Akteuren im Netzwerk von Frau C liegt bei mehr als 5. Daher sind viele Absprachen unter den Akteuren nötig. Kommunikation und Organisation im Netzwerk sind komplex.

### Bewertungsskala:

| Die Zusammenarbeit in Netzwerken ist...                                                                         | Komplexitätsgrad |
|-----------------------------------------------------------------------------------------------------------------|------------------|
| <b>einfach</b> , wenn nur ein Akteur im Alltag die pflegebedürftige Person unterstützt                          | 1                |
| <b>kompliziert</b> , wenn wenige Akteure (2-4) gemeinsam im Alltag die pflegebedürftige Person unterstützen.    | 2                |
| <b>komplex</b> , wenn viele Akteure (5 oder mehr) gemeinsam im Alltag die pflegebedürftige Person unterstützen. | 3                |

Komplexitätsgrad des Merkmals „Netzwerkgröße“:

## 2. Stabilität des Netzwerks

### **Beschreibung des Merkmals «Stabilität des Netzwerks»:**

Ein Netzwerk ist stabil, wenn es seit längerem besteht, die Akteure nicht wechseln und alle ihren Aufgaben zuverlässig nachkommen. Instabilität eines Netzwerks macht Zusammenarbeit komplizierter. Wenn Akteure das Netzwerk verlassen entstehen Lücken in den Strukturen. Sobald neue Akteure dazukommen, müssen diese in das Netzwerk eingearbeitet werden. Ebenso ist ein Netzwerk instabil, wenn einzelne Akteure ihren Aufgaben nicht verlässlich nachkommen. Beides bedeutet, dass die Zusammenarbeit der Akteure neu strukturiert und geregelt und eine Verlässlichkeit hergestellt werden muss.

### **Zu berücksichtigen bei der Bewertung sind alle im Netzwerk beteiligten Akteure.**

**Beispiel 1 (einfach):** Herr A ist seit zwei Jahren pflegebedürftig. Seitdem kümmern sich seine zwei Söhne verlässlich um seine Versorgung. Das Netzwerk hat sich nicht geändert. Das Netzwerk ist daher stabil und die Zusammenarbeit ist einfach.

**Beispiel 2 (kompliziert):** Herr B ist seit zwei Jahren pflegebedürftig. Seitdem kümmern sich seine zwei Söhne, ein ambulanter Pflegedienst und eine Physiotherapeutin um ihn. Ein Sohn ist beruflich stark eingespannt und kann seinen Aufgaben nicht immer verlässlich nachkommen. Die Physiotherapeutin hat neulich gewechselt. Die restlichen Akteure haben sich nicht geändert. Das Netzwerk ist nur teilweise stabil und die Zusammenarbeit daher als kompliziert einzustufen.

**Beispiel 3 (komplex):** Herr C ist seit zwei Jahren pflegebedürftig. Er bekommt Unterstützung von seinen zwei Söhnen und einem ambulanten Pflegedienst. Beim ambulanten Dienst kommt es immer wieder zu Personalwechsel. Einer der beiden Söhne ist letzten Monat weit weggezogen und kann seinen Aufgaben nicht mehr nachkommen. Noch ist kein Ersatz für ihn gefunden. Immer wieder springt die Nachbarin ein. Das Netzwerk ist instabil. Kommunikations- und Organisationsregeln müssen immer wieder neu festgelegt werden und die Zusammenarbeit ist komplex.

### Bewertungsskala:

| Die Zusammenarbeit in Netzwerken ist...                                                                                                               | Komplexitätsgrad |
|-------------------------------------------------------------------------------------------------------------------------------------------------------|------------------|
| <b>einfach</b> , wenn das Netzwerk mit seinen Akteuren stabil ist.                                                                                    | 1                |
| <b>kompliziert</b> , wenn das Netzwerk instabil ist, aber ein gewisser Stamm, verlässlicher Akteure besteht.                                          | 2                |
| <b>komplex</b> , wenn das Netzwerk instabil ist und dadurch Kommunikations- und Organisationsregeln ständig neu erklärt und festgelegt werden müssen. | 3                |

Komplexitätsgrad des Merkmals „Stabilität des Netzwerks“:

### 3. Akteursstruktur

#### **Beschreibung des Merkmals «Akteursstruktur»:**

In ein Pflegenetzwerk können unterschiedliche Akteursarten involviert sein. Folgende Akteursarten werden unterschieden:

- Informelle Akteure wie z.B. Familienangehörige, Nachbarn oder Freunde
- Semi-professionelle Akteure wie z.B. Nachbarschaftsvereine oder ehrenamtliche Einrichtungen
- Professionelle Akteure wie z.B. Pflegefachkräfte, Ärztinnen und Ärzte, oder aktive\* Technik

Jede Akteursart hat ihre eigenen Regeln der Kommunikation, unterschiedliche Kommunikationsmedien und ggf. andere institutionelle Vorgaben. Je mehr Akteursarten in einem Netzwerk vertreten sind, desto komplizierter ist die Zusammenarbeit.

#### **Zu berücksichtigen bei der Bewertung sind alle im Netzwerk beteiligten Akteure.**

**Beispiel 1 (einfach):** Das Netzwerk von Frau A umfasst ihren Ehemann, ihre beiden Töchter und eine engagierte Nachbarin. Alle gehören zu den informellen Akteuren. Die Zusammenarbeit ist einfach.

**Beispiel 2 (kompliziert):** Das Netzwerk von Frau B umfasst ihren Ehemann, ihre beiden Töchter und eine ehrenamtliche Helferin aus einem Nachbarschaftsverein. Somit sind zwei Akteursarten im Netzwerk vertreten. Die Zusammenarbeit ist kompliziert.

**Beispiel 3 (komplex):** Das Netzwerk von Frau C umfasst ihren Ehemann, eine ehrenamtliche Helferin aus einem Nachbarschaftsverein und eine Pflegefachkraft. Somit sind alle 3 Akteursarten vertreten. Die Zusammenarbeit ist komplex.

---

\* Technik kann als aktiver Kollaborationsakteur agieren oder eine passive Infrastruktur sein. Nur wenn Technik eine Rolle bei der Koordination von Aufgaben spielt (z. B. ein Matching-Tool für Aufgaben und Akteure) oder aktiv Informationen an die anderen Akteure übermittelt (z. B. ein Monitoringsystem, das eine pflegebedürftige Person überwacht und im Notfall andere Akteure alarmiert), kann sie als kollaborierender Akteur des Netzwerks gezählt werden. Andernfalls kann Technik ein wichtiger Teil der Netzwerkinfrastruktur sein, aber kein aktiver, steuernder, ausführender Akteur in der Zusammenarbeit.

### Bewertungsskala:

| Die Zusammenarbeit in Netzwerken ist...                                                                                           | Komplexitätsgrad |
|-----------------------------------------------------------------------------------------------------------------------------------|------------------|
| <b>einfach</b> , wenn nur eine Akteursart im Netzwerk vertreten ist (informelle, semiprofessionelle oder professionelle Akteure). | <b>1</b>         |
| <b>kompliziert</b> , wenn zwei Akteursarten im Netzwerk vertreten sind.                                                           | <b>2</b>         |
| <b>komplex</b> , wenn alle Akteursarten im Netzwerk vertreten sind (informelle, semiprofessionelle und professionelle Akteure).   | <b>3</b>         |

Komplexitätsgrad des Merkmals „Akteursstruktur“:

## 4. Verhältnis

### **Beschreibung des Merkmals «Verhältnis»:**

Ob sich Akteure als Netzwerk verstehen und offen für Zusammenarbeit sind, hängt zu einem maßgeblichen Teil davon ab, wie das Verhältnis untereinander ist. Spannungen und Konflikte schränken die Zusammenarbeit in Netzwerken ein. Es besteht die Gefahr, dass Informationen nicht direkt an alle bzw. relevante Akteure weitergeben werden. Es entstehen komplizierte Kommunikationswege und das Hilfspotenzial wird nicht voll ausgeschöpft.

### **Zu berücksichtigen bei der Bewertung sind alle im Netzwerk beteiligten Akteure.**

**Beispiel 1 (einfach):** Im Netzwerk von Herrn A unterstützen seine beiden Töchter, ein ambulanter Pflegedienst und ein ehrenamtlicher Helfer. Alle verstehen sich sehr gut. Die Zusammenarbeit im Netzwerk ist einfach.

**Beispiel 2 (kompliziert):** Im Netzwerk von Herrn B unterstützen seine beiden Töchter, ein ambulanter Pflegedienst und ein ehrenamtlicher Helfer. Zwischen den beiden Töchtern gibt es öfters Streit, weshalb die beiden nicht mehr miteinander sprechen. Die Zusammenarbeit im Netzwerk ist kompliziert.

**Beispiel 3 (komplex):** Im Netzwerk von Herrn C unterstützen seine beiden Töchter, ein ambulanter Pflegedienst und ein ehrenamtlicher Helfer. Zwischen den beiden Töchtern gibt es öfters Streit. Auch verstehen sie sich mit den Pflegekräften des ambulanten Dienstes nicht so gut. Alle versuchen sich aus dem Weg zu gehen. Die Zusammenarbeit im Netzwerk ist komplex.

### Bewertungsskala:

| Die Zusammenarbeit in Netzwerken ist...                                             | Komplexitätsgrad |
|-------------------------------------------------------------------------------------|------------------|
| <b>einfach</b> , wenn das Verhältnis der Akteure spannungsfrei ist.                 | <b>1</b>         |
| <b>kompliziert</b> , wenn es Spannungen zwischen einzelnen Akteuren gibt.           | <b>2</b>         |
| <b>komplex</b> , wenn das Verhältnis zwischen der Mehrheit der Akteure gestört ist. | <b>3</b>         |

Komplexitätsgrad des Merkmals „Verhältnis“:



## 5. Aufgabentrennung

### **Beschreibung des Merkmals «Aufgabentrennung»:**

Die Zusammenarbeit der Akteure im Netzwerk wird davon beeinflusst, wie die Aufgaben unter den Akteuren verteilt sind. Wenn Aufgaben klar unter den Akteuren im Netzwerk aufgeteilt sind, müssen sich die Akteure weniger absprechen. Die Zusammenarbeit ist dadurch einfacher. Sobald sich die Aufgaben von Akteuren überschneiden, müssen sie sich mit anderen Akteuren austauschen und ihre Aufgaben koordinieren.

### **Zu berücksichtigen bei der Bewertung sind die Alltagsakteure.**

**Beispiel 1 (einfach):** Im Netzwerk von Frau A unterstützen ihre Tochter und ihre Enkelin. Die Tochter kümmert sich um hauswirtschaftliche Aufgaben und ihre Enkelin übernimmt die Fahrdienste. Die Aufgaben sind klar getrennt und die Zusammenarbeit im Netzwerk ist einfach.

**Beispiel 2 (kompliziert):** Im Netzwerk von Frau A unterstützen ihre Tochter und ihre drei Enkel. Seine Tochter kümmert sich um hauswirtschaftliche Aufgaben und ihre drei Enkel übernehmen abwechselnd die Fahrdienste. Die Enkel müssen sich bezüglich der Einsatzzeiten absprechen. Die Zusammenarbeit ist kompliziert.

**Beispiel 3 (komplex):** Im Netzwerk von Frau A unterstützen ihre Tochter und ihre drei Enkel. Jedoch gibt es keine klare Aufgabenverteilung. Die Akteure übernehmen spontan die anstehenden Aufgaben. Die Akteure müssen sich nun viel öfters absprechen, um keine Aufgaben doppelt zu erledigen oder welche zu vergessen. Die Zusammenarbeit ist komplex.

### Bewertungsskala:

| Die Zusammenarbeit in Netzwerken ist...                                                                      | Komplexitätsgrad |
|--------------------------------------------------------------------------------------------------------------|------------------|
| <b>einfach</b> , wenn es klare Aufgabenfelder zwischen den Akteuren gibt und diese sich nicht überschneiden. | <b>1</b>         |
| <b>kompliziert</b> , wenn sich mehrere Akteure Aufgabenfelder teilen.                                        | <b>2</b>         |
| <b>komplex</b> , wenn es zwischen manchen Akteuren keine klaren Aufgabenfelder gibt oder alle alles machen.  | <b>3</b>         |

Komplexitätsgrad des Merkmals „Aufgabentrennung“:

## 6. Aufgabentypen

### **Beschreibung des Merkmals «Aufgabentypen»:**

Die Komplexität der Zusammenarbeit wird davon beeinflusst, welcher Akteur welche Aufgaben hat. Aufgaben in einem Netzwerk lassen sich in drei Typen unterteilen:

- Organisation von Aufgaben z.B. die Koordination von Fahrdiensten
- „Hands on“ wie z.B. pflegerische oder hauswirtschaftliche Tätigkeiten
- Besuche und psychosoziale Unterstützung z.B. ein Spaziergang oder ein Telefonat mit der pflegebedürftigen Person

Je nachdem auf wie viele Schultern die Aufgaben verteilt sind, ist Zusammenarbeit einfach, kompliziert oder komplex.

### **Zu berücksichtigen bei der Bewertung sind die Alltagsakteure.**

**Beispiel 1 (einfach):** Die Ehefrau des pflegebedürftigen Herrn A organisiert alle Aufgaben für die alltägliche Versorgung. Zugleich unterstützt sie selbst bei den pflegerischen und hauswirtschaftlichen Tätigkeiten. Dadurch liegt sowohl die Koordination als auch die Durchführung der Versorgung bei ihr. Die Zusammenarbeit im Netzwerk ist einfach, da sie sich mit niemandem absprechen muss.

**Beispiel 2 (kompliziert):** Die Ehefrau des pflegebedürftigen Herrn B organisiert alle Aufgaben zur Versorgung. Eine Pflegefachkraft sowie der Sohn übernehmen die pflegerischen Aufgaben. Die ausführenden Aufgaben sind nun unter mehreren Personen aufgeteilt. Die Zusammenarbeit ist kompliziert.

**Beispiel 3 (komplex):** Die Ehefrau sowie der Sohn des pflegebedürftigen Herrn C organisieren Aufgaben zur Versorgung. Eine Pflegefachkraft sowie der Sohn übernehmen die pflegerischen Aufgaben. Sowohl die Organisation als auch die Durchführung der Aufgaben sind unter mehreren Akteuren aufgeteilt. Die Zusammenarbeit ist komplex.

### Bewertungsskala:

| Die Zusammenarbeit in Netzwerken ist...                                                                                               | Komplexitätsgrad |
|---------------------------------------------------------------------------------------------------------------------------------------|------------------|
| <b>einfach</b> , wenn ein Akteur sowohl für die Organisation, aus auch für die Durchführung alltäglichen Versorgung zuständig ist.    | <b>1</b>         |
| <b>kompliziert</b> , wenn ein Akteur für die alltägliche Versorgung zuständig ist, aber mehrere Akteure diese ausführen.              | <b>2</b>         |
| <b>komplex</b> , wenn sowohl die Organisation als auch die Durchführung der alltäglichen Versorgung auf mehrere Akteure verteilt ist. | <b>3</b>         |

Komplexitätsgrad des Merkmals „Aufgabentypen“:

## 7. Aufgabenkoordination

### **Beschreibung des Merkmals «Aufgabenkoordination»:**

Für die Zusammenarbeit im Netzwerk ist es wichtig, dass die Aufgaben der Akteure koordiniert werden. Wie komplex die Zusammenarbeit zwischen den Akteuren ist, hängt davon ab, ob und wie viele Akteure für die Koordination der Aufgaben zuständig sind.

### **Zu berücksichtigen bei der Bewertung sind die Alltagsakteure.**

**Beispiel 1 (einfach):** Im Netzwerk der pflegebedürftigen Frau A ist ihre Schwester für die Koordination der alltäglichen Versorgung verantwortlich. Diese hat den Überblick über das Netzwerk. Sie verteilt die Aufgaben zur alltäglichen Versorgung auf die Akteure. Die Zusammenarbeit ist einfach.

**Beispiel 2 (kompliziert):** Im Netzwerk der pflegebedürftigen Frau B sind für die Koordination der Aufgaben sowohl die Schwester als auch die Tochter zuständig. Sie teilen sich die Koordination der Aufgaben und wechseln sich ab. Die Zusammenarbeit ist nun kompliziert.

**Beispiel 3 (komplex):** Im Netzwerk der pflegebedürftigen Frau C gibt es keinen Akteur, der die Aufgaben koordiniert. Alle Akteure übernehmen spontan die Aufgaben, die es zu erledigen gibt. Die Zusammenarbeit ist komplex.

### Bewertungsskala:

| Die Zusammenarbeit in Netzwerken ist...                                                                                                                                                                     | Komplexitätsgrad |
|-------------------------------------------------------------------------------------------------------------------------------------------------------------------------------------------------------------|------------------|
| <b>einfach</b> , wenn ein Akteur für die Koordination der alltäglichen Versorgung verantwortlich ist (egal ob professionell, semiprofessionell, informell oder die unterstützungsbedürftige Person selbst). | <b>1</b>         |
| <b>kompliziert</b> , wenn mehrere Akteure für die Koordination der alltäglichen Versorgung verantwortlich sind.                                                                                             | <b>2</b>         |
| <b>komplex</b> , wenn kein Akteur für die Koordination der alltäglichen Versorgung verantwortlich ist und situativ reagiert wird.                                                                           | <b>3</b>         |

Komplexitätsgrad des Merkmals „Aufgabenkoordination“:

## 8. Möglichkeiten sich zu treffen

### **Beschreibung des Merkmals «Möglichkeiten sich zu treffen»:**

Je näher die Akteure zusammenwohnen, desto höher ist die Chance für zufällige Begegnungen z.B. beim Bäcker. Durch zufällige und spontane Treffen können Informationen schnell und einfach ausgetauscht werden. Wenn die Akteure weit voneinander entfernt wohnen, besteht keine Möglichkeit für zufällige Begegnungen. Der Austausch muss vorausschauend geplant werden.

### **Zu berücksichtigen bei der Bewertung sind die Alltagsakteure.**

**Beispiel 1 (einfach):** Die Akteure des Netzwerks von Herrn A wohnen alle im selben Haus. In der unteren Wohnung lebt der pflegebedürftige Herr A. Im ersten Stock wohnt sein Sohn mit Frau. Im zweiten Stock wohnt der Enkel in einer eigenen Wohnung. Die Akteure stoßen daher öfters zufällig im Hausflur aufeinander und können sich schnell absprechen. Die Zusammenarbeit ist einfach.

**Beispiel 2 (kompliziert):** Im Netzwerk des pflegebedürftigen Herrn B unterstützen seine Nachbarin und seine Tochter. Die Tochter wohnt eine Straße weiter. Die Tochter und die Nachbarin treffen sich öfters zufällig beim Bäcker und können sich dabei austauschen. Die Zusammenarbeit ist kompliziert.

**Beispiel 3 (komplex):** Im Netzwerk des pflegebedürftigen Herrn C unterstützen seine Tochter und sein Sohn. Die Tochter wohnt eine Straße weiter. Der Sohn wohnt 50 km entfernt in einer anderen Stadt. Er kommt nur selten bei seiner pflegebedürftigen Mutter vorbei, ruft dafür jeden Tag bei ihr an. Die beiden Akteure wohnen so weit voneinander entfernt, sodass sie sich nie zufällig treffen. Sie müssen sich daher frühzeitig verabreden, um sich austauschen zu können. Die Zusammenarbeit ist komplex.

### Bewertungsskala:

| Die Zusammenarbeit in Netzwerken ist...                                                                                                                                               | Komplexitätsgrad |
|---------------------------------------------------------------------------------------------------------------------------------------------------------------------------------------|------------------|
| <b>einfach</b> , wenn alle Hauptakteure im selben Haus oder auf demselben Gelände wohnen bzw. praktizieren. Sie haben dadurch die Möglichkeit sich zufällig zu treffen.               | <b>1</b>         |
| <b>kompliziert</b> , wenn die Hauptakteure im selben Quartier wohnen bzw. praktizieren. Sie haben dadurch die Möglichkeit sich zufällig zu treffen.                                   | <b>2</b>         |
| <b>komplex</b> , wenn die Hauptakteure in unterschiedlichen Quartieren (in räumlicher Distanz) leben und praktizieren. Sie haben somit kaum die Möglichkeit sich zufällig zu treffen. | <b>3</b>         |

Komplexitätsgrad des Merkmals „Möglichkeiten sich zu treffen“:



## 9. Kommunikationsregeln

### **Beschreibung des Merkmals «Kommunikationsregeln»:**

Ein regelmäßiger Austausch zwischen den Akteuren erleichtert die Zusammenarbeit im Netzwerk. Feste Rituale wie z.B. wöchentliche Treffen bieten eine optimale Voraussetzung für eine geregelte Kommunikation. Ohne geregelten Austausch, erhöht sich die Komplexität der Zusammenarbeit.

### **Zu berücksichtigen bei der Bewertung sind die Alltagsakteure.**

**Beispiel 1 (einfach):** Die Akteure im Netzwerk der pflegebedürftigen Frau A sind alle enge Familienangehörige. Die Tochter, ihr Mann und die Enkel treffen sich jeden Sonntag zum Mittagessen. Dabei können sie sich zu Versorgungsthemen austauschen. Die Zusammenarbeit ist einfach.

**Beispiel 2 (einfach):** Im Netzwerk von Frau B sind ebenfalls enge Familienmitglieder. Frau B unterstützen die Tochter, ihr Schwiegersohn und die Enkel. Eigentlich wollen alle jeden Sonntag zusammen Mittagessen. Allerdings sind nie alle dabei. Das wöchentliche Ritual der Kommunikation zu Versorgungsthemen wird daher nicht von allen eingehalten. Die Zusammenarbeit ist kompliziert.

**Beispiel 2 (komplex):** Im Netzwerk von Frau C treffen sich die Akteure sich nicht regelmäßig und es gibt keine festgelegten Regeln zur Kommunikation unter allen Akteuren. Die Zusammenarbeit ist komplex.

### Bewertungsskala:

| Die Zusammenarbeit in Netzwerken ist...                                                                                                                        | Komplexitätsgrad |
|----------------------------------------------------------------------------------------------------------------------------------------------------------------|------------------|
| <b>einfach</b> , wenn es feste Rituale zur Kommunikation zum Thema Versorgung gibt (z.B. wöchentliche Treffen).                                                | <b>1</b>         |
| <b>kompliziert</b> , wenn es Regeln (z.B. wöchentliche Treffen) zur Kommunikation zum Thema Pflege gibt, diese aber nicht strikt von allen eingehalten werden. | <b>2</b>         |
| <b>komplex</b> , wenn es keine Regeln zur Kommunikation zum Thema Versorgung gibt.                                                                             | <b>3</b>         |

Komplexitätsgrad des Merkmals „Kommunikationsregeln“:

## 10. Akteure mit Abstimmungsbedarf

### **Beschreibung des Merkmals «Abstimmungsbedarf zwischen Akteuren»:**

Die Komplexität der Zusammenarbeit hängt davon ab, wie viele Akteure sich zu einem Thema abstimmen müssen. Umso mehr Akteure sich absprechen müssen, umso größer ist der Abstimmungsaufwand.

### **Zu berücksichtigen bei der Bewertung sind die Alltagsakteure.**

**Beispiel 1 (einfach):** Den pflegebedürftigen Herrn A unterstützen seine Ehefrau und eine Pflegefachkraft. Zu Versorgungsthemen müssen sich nur die beiden Akteure abstimmen. Die Zusammenarbeit ist einfach.

**Beispiel 2 (kompliziert):** Den pflegebedürftigen Herrn B unterstützen seine Ehefrau, sein Bruder und eine Pflegefachkraft. Zu Versorgungsthemen müssen sich alle drei Akteure abstimmen. Die Zusammenarbeit ist nun kompliziert.

**Beispiel 3 (komplex):** Herr C ist sehr pflegebedürftig. Ihn unterstützen daher viele Akteure im Alltag. An der Versorgung beteiligt sind seine Ehefrau, sein Bruder, seine beiden Kinder und eine Pflegefachkraft. Mehr als 4 Akteure müssen sich nun für die Versorgung von Herrn C abstimmen. Die Zusammenarbeit ist komplex.

### Bewertungsskala:

| Die Zusammenarbeit in Netzwerken ist...                                                                     | Komplexitätsgrad |
|-------------------------------------------------------------------------------------------------------------|------------------|
| <b>einfach</b> , wenn Abstimmungsbedarf immer nur zwischen zwei Akteuren nötig ist.                         | <b>1</b>         |
| <b>kompliziert</b> , wenn Abstimmungsbedarf unter mehreren Akteuren (bis zu 4) besteht.                     | <b>2</b>         |
| <b>komplex</b> , wenn es Abstimmungsbedarf über Versorgungsthemen mit vielen (mehr als 4) Akteuren besteht. | <b>3</b>         |

Komplexitätsgrad des Merkmals „Akteuer mit Abstimmungsbedarf“:

# 11. Häufigkeit des Abstimmungsbedarfs

## **Beschreibung des Merkmals «Häufigkeit des Abstimmungsbedarfs»:**

Für die Komplexität der Zusammenarbeit ist ausschlaggebend, wie oft sich die Akteure absprechen müssen. Hier spielen Faktoren wie der Gesundheitszustand des Versorgungsbedürftigen, aber auch Netzwerkgröße und Aufgabentrennung, eine Rolle. Je instabiler der Gesundheitszustand, je mehr Personen an der Versorgung beteiligt sind und je verflochtener die Aufgaben sind, umso häufiger müssen sich die Akteure im Netzwerk absprechen. Somit steigt die Komplexität der Zusammenarbeit.

## **Zu berücksichtigen bei der Bewertung sind die Alltagsakteure.**

**Beispiel 1 (einfach):** Frau A ist alleinstehend und organisiert ihre Versorgung selbst. Vierteljährlich lässt sie sich von seinem Hausarzt vorsorglich untersuchen und füllt ihre Medikamentenvorräte auf. Mit der Nachbarschaftshilfe hat sie wöchentliche hauswirtschaftliche Unterstützung vereinbart. Dienstag, 14.00 – 16.00 Uhr wurde hierfür festgelegt. Jeden Donnerstag kommt ihre Tochter für zwei Stunden und leistet ihr Gesellschaft. Es gibt keinen Bedarf für Abstimmungen unterhalb der Akteure. Die Zusammenarbeit ist einfach.

**Beispiel 2 (kompliziert):** Frau B wird von ihrer Tochter Zuhause versorgt. Die lokale Nachbarschaftshilfe unterstützt Frau B 1x wöchentlich bei hauswirtschaftlichen Tätigkeiten. Als Frau B stürzt bricht sie sich den rechten Unterarm. Ihre Tochter kann die hierdurch anfallenden Tätigkeiten zusätzlich zu ihren bisherigen Unterstützungsleistungen übernehmen. Auf Grund der klaren Aufgabentrennung sind Abstimmungen zwischen der Nachbarschaftshilfe, Frau B und ihrer Tochter auch in einer solchen Situation nur selten notwendig. Die Zusammenarbeit ist kompliziert.

**Beispiel 3 (komplex):** Frau C ist bettlägerig. Eine Vielzahl an Akteuren ist an ihrer Versorgung beteiligt. Auf Grund des instabilen Gesundheitszustands sind komplexe Arbeitsabläufe und eine enge Abstimmung der Akteure untereinander an der Tagesordnung. Die Zusammenarbeit ist komplex.

### Bewertungsskala:

| Die Zusammenarbeit in Netzwerken ist...                                                              | Komplexitätsgrad |
|------------------------------------------------------------------------------------------------------|------------------|
| <b>einfach</b> , wenn sich die Akteure weniger als monatlich abstimmen müssen.                       | <b>1</b>         |
| <b>kompliziert</b> , wenn sich die Akteure einmal wöchentlich bis einmal monatlich abstimmen müssen. | <b>2</b>         |
| <b>komplex</b> , wenn sich die Akteure mehrmals wöchentlich abstimmen müssen.                        | <b>3</b>         |

Komplexitätsgrad des Merkmals „Häufigkeit des Abstimmungsbedarfs“:

## 12. Kommunikationswege

### Beschreibung des Merkmals «Kommunikationswege»:

Kommunikationswegen können in drei Arten unterschieden werden:

- **Die Sternförmige Kommunikation:** Hier ist ein Akteur im Mittelpunkt des Netzwerks, über den die Kommunikation läuft. Alle Akteure richten sich bei Fragen etc. an diesen Akteur.

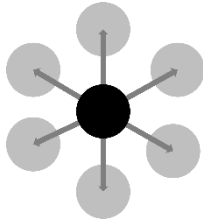

- **Geteilte Kommunikation:** Akteure tauschen sich zu bestimmten Themen nur mit bestimmten Akteuren aus. Es gibt keinen Akteur, der alle Informationen bündelt.

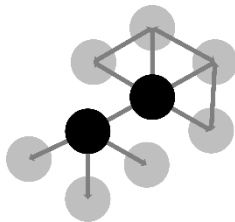

- **Vermaschte Kommunikation:** Wenn es Austauschbedarf zwischen Akteuren gibt, müssen alle mit allen kommunizieren, um die notwendigen Informationen zu erhalten. Informationen werden nicht bei einzelnen gebündelt.

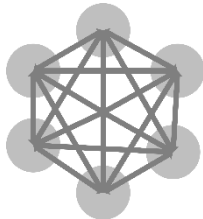

**Zu berücksichtigen bei der Bewertung sind alle im Netzwerk beteiligten Akteure.**

**Beispiel 1 (einfach):** Im Netzwerk von Herrn A steht die Tochter im Mittelpunkt der Kommunikation. Alle Informationen laufen bei der Tochter zusammen. Die Tochter kann somit Informationen gebündelt an die anderen Akteure weiterleiten. Die Kommunikation ist einfach.

**Beispiel 2 (kompliziert):** Herr B wird unter anderem von seinem Sohn und seiner Tochter versorgt. Beide arbeiten zusammen in der gleichen Firma und tauschen sich, aufgrund der räumlichen Nähe eng miteinander aus. Herr B's Schwiegertochter unterstützt das Netzwerk durch hauswirtschaftliche Tätigkeiten. Sie kommuniziert im Netzwerk ausschließlich über Ihren Ehemann. Die Kommunikation ist somit geteilt und als kompliziert zu bezeichnen.

**Beispiel 3 (komplex):** Im Netzwerk von Herrn C gibt es keinen Akteur, bei dem Informationen zusammenlaufen. Wenn ein Akteur etwas wissen möchte muss er sich durchfragen, um die relevante Information zu erhalten. Es werden keine Informationen bei einer Person gebündelt. Die Kommunikation unter den Akteuren ist komplex.

**Bewertungsskala:**

| Die Zusammenarbeit in Netzwerken ist...                                                                         | Komplexitätsgrad |
|-----------------------------------------------------------------------------------------------------------------|------------------|
| <b>einfach</b> , wenn die Kommunikation über einen hauptverantwortlichen Akteur läuft.                          | <b>1</b>         |
| <b>kompliziert</b> , wenn getrennte Kommunikation zu bestimmten Themen nur mit bestimmten Akteuren stattfindet. | <b>2</b>         |
| <b>komplex</b> , wenn jeder mit jedem sprechen muss, um alle nötigen Informationen zu erhalten.                 | <b>3</b>         |

Komplexitätsgrad des Merkmals „Kommunikationswege“:



## 13. Kommunikationskanäle

### **Beschreibung des Merkmals «Kommunikationskanäle»:**

Gerade in stressreichen Situationen sind Gewohnheiten wichtig. Im Fall der Versorgung einer Person bedeutet dies, dass man z.B. im Notfall weiß wie man den Hausarzt, den Pflegedienst oder den Nachbarn am besten erreichen kann.

### **Zu berücksichtigen bei der Bewertung sind alle im Netzwerk beteiligten Akteure.**

**Beispiel 1 (einfach):** Im Netzwerk von Frau A verständigen sich alle Akteure per Telefon. Wie sie einander erreichen ist somit absolut klar. Die Kommunikation kann wie gewohnt ablaufen. Die Zusammenarbeit ist einfach.

**Beispiel 2 (kompliziert):** Im Netzwerk von Frau B verständigen sich alle über unterschiedliche Kommunikationskanäle. Der ambulante Pflegedienst ist gut per E-Mail erreichbar. Der Arzt muss angerufen werden. Ihre Kinder nutzen einen Messenger Dienst. Es ist für alle Akteure zwar klar, wie die anderen erreicht werden können. Die Akteure müssen sich jedoch Gedanken machen, über welches Medium sie die andere Person erreichen. Die Zusammenarbeit ist kompliziert.

**Beispiel 3 (komplex):** Die Akteure im Netzwerk von Frau C wissen nicht, wie sie die anderen Akteure am besten erreichen können. Der richtige Kommunikationskanal muss jedes Mal situativ herausgefunden werden. Dies hat z.B. mehrfaches Hinterher-Telefonieren von Akteuren zur Folge. Die Zusammenarbeit ist komplex.

### Bewertungsskala:

| Die Zusammenarbeit in Netzwerken ist...                                                                             | Komplexitätsgrad |
|---------------------------------------------------------------------------------------------------------------------|------------------|
| <b>einfach</b> , wenn alle Akteure über den gleichen Kommunikationskanal kommunizieren.                             | <b>1</b>         |
| <b>kompliziert</b> , wenn die Kommunikation über unterschiedliche, aber geregelte Kommunikationskanäle stattfindet. | <b>2</b>         |
| <b>komplex</b> , wenn es keine geregelten Kommunikationskanäle gibt.                                                | <b>3</b>         |

Komplexitätsgrad des Merkmals „Kommunikationskanäle“:

# Gesamtauswertung

Nun haben Sie alle Merkmale der Zusammenarbeit in Ihrem Pflegenetzwerk hinsichtlich der Komplexität bewertet.

1. **Übertragen Sie jetzt die vergebenen Komplexitätsgrade** je Merkmal in die Ausfüllvorlage des Spinnennetzdiagramms (Abbildung 2).  
Machen sie dafür je Merkmal einen Punkt auf dem entsprechenden Kreis 1, 2 oder 3.
2. **Verbinden Sie die Punkte** miteinander.

Hierdurch erhalten Sie eine Visualisierung der Zusammenarbeit in Ihrem Pflegenetzwerk in Form eines Spinnennetz-Diagramms.

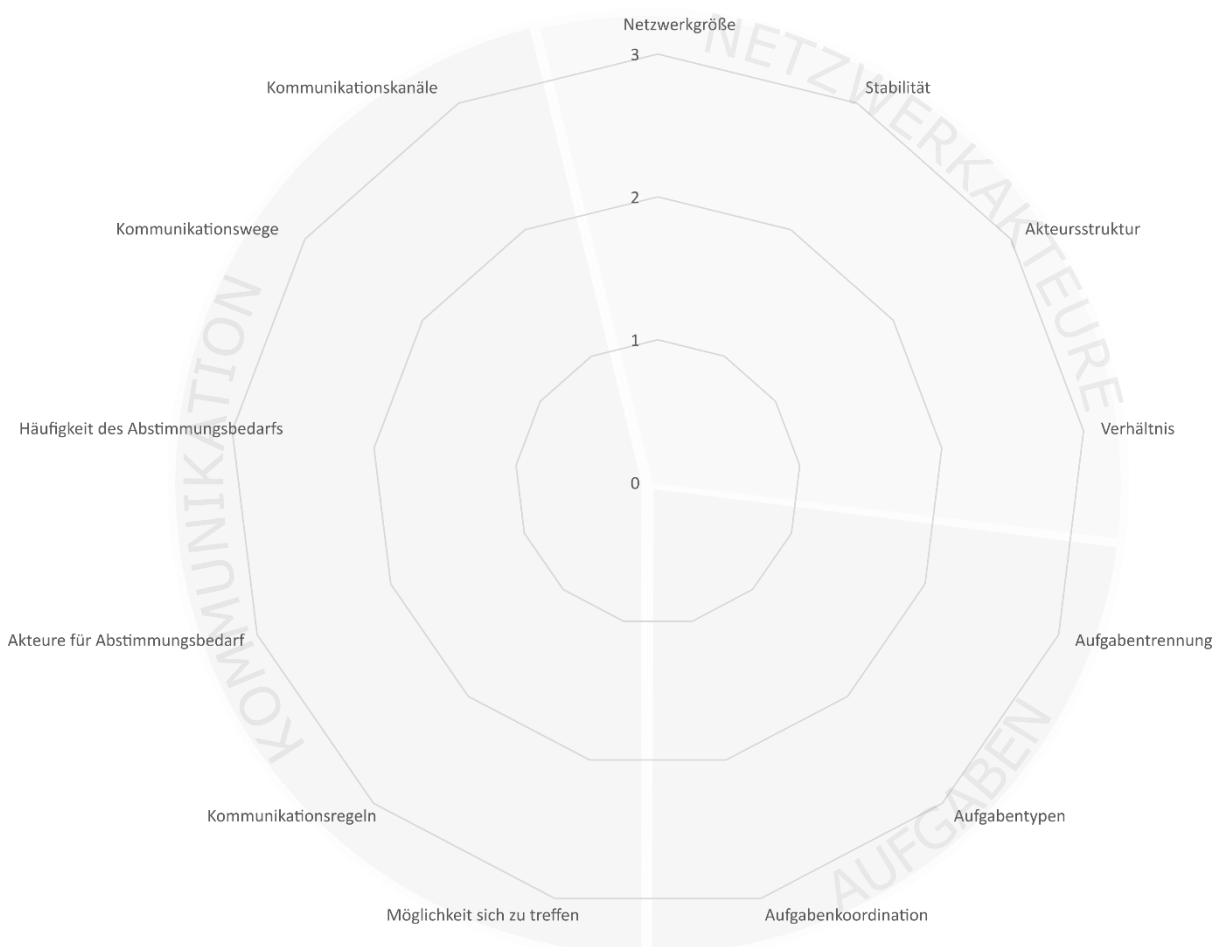

Abbildung 2: Ausfüllvorlage des Spinnennetzdiagramms zur zusammenfassenden Visualisierung der Komplexität der Zusammenarbeit im Pflegenetzwerk

Die Darstellungsform im Spinnennetz-Diagramm ermöglicht Ihnen einen Überblick über die Komplexität zu einzelnen Merkmalen Ihres Netzwerks zu erhalten. Die sich

daraus ergebenden **Handlungsmöglichkeiten** sind vielfältig. Das Diagramm kann Ihnen, z.B., als **Diskussionsgrundlage** im Netzwerk zur Anregung von Verbesserungen dienen.

Wichtig ist an dieser Stelle ist zu erwähnen, **dass eine hohe Komplexität keine negative Bewertung bedeutet**. Z.B. lässt sich aus einer komplexen Netzwerkgröße nicht schlussfolgern, dass die Anzahl der Netzwerkakteure reduziert werden sollte. Es ist eher so, dass sich die Aufgabenverteilung auf viele Akteure eher positiv auf die Belastung von pflegenden Angehörigen auswirkt. Es bedeutet lediglich, dass die Organisation und Kommunikation komplex sind.

Das KomZiP-Tool soll dazu beitragen, sich die IST-Situation der Zusammenarbeit im Netzwerk bewusst zu machen und auf die Komplexität der Kommunikation und Organisation hinzuweisen. Im Dialog können darauf aufbauend miteinander Möglichkeiten für eine gute Zusammenarbeit entwickelt werden.

**Wir wünschen Ihnen bei der Zusammenarbeit viel Erfolg!**
