# Supplementary material for: Uncovering the Complexity of Care Networks – Towards a Taxonomy of Collaboration Complexity in Homecare
Source: Springer Nature journal article supplement (doi:10.1007/s10606-022-09433-8), 2022-06-08
Supplement: MOESM5 [file 23141948]

Supplementary Material: Appendix 5:

Article title:

## **Uncovering the Complexity of Care Networks – Towards a Taxonomy of Collaboration Complexity in Homecare**

Journal name: Computer Supported Cooperative Work

Authors:

Madeleine Renyi<sup>1,2</sup>, Petra Gaugisch<sup>3</sup>, Alexandra Hunck<sup>3</sup>, Stefan Strunck<sup>3</sup>, Christophe Kunze<sup>1</sup>, Frank Teuteberg<sup>2</sup>

<sup>1</sup>Technology and Inclusion Lab, Furtwangen University, Robert-Gerwig-Platz 1, 78120 Furtwangen, Germany  
{madeleine.renyi; christophe.kunze}@hs-furtwangen.de

<sup>2</sup>Institute for Information Management and Information Systems Engineering, Osnabrück University, Katharinenstr. 1, 49069 Osnabrück, Germany  
{mrenyi; frank.teuteberg}@uni-osnabrueck.de}

<sup>3</sup>Fraunhofer Institute for Industrial Engineering (IAO), Nobelstr. 12, 70569 Stuttgart, Germany  
{petra.gaugisch; stefan.strunck}@iao.fraunhofer.de  
alexandra.hunck@googlemail.com

### **Corresponding Author:**

Madeleine Renyi

Affiliation bound contact details:

Address: Robert-Gerwig-Platz 1, 78120 Furtwangen, Germany

Email: [madeleine.renyi@hs-furtwangen.de](mailto:madeleine.renyi@hs-furtwangen.de)

Permanent contact details:

Email: [info@madeleinerenyi.de](mailto:info@madeleinerenyi.de)

## Supplementary Material

Appendix 5:

Document Title: Technology cards

Description: calendar, monitoring, tasks, documents, messenger

## Appendix 5

### *calendar*

1. shared calendar in the care network?
  - yes:
    - in paper form on the care recipient's premises
    - online / digital shared (e.g. Google Calendar)  
name of the application: \_\_\_\_\_
  - no
2. Who has access to the calendar?
  - all
  - only chosen persons (private usage)
  - only chosen persons (*private + professional usage*)

### *monitoring*

1. digital technologies to support the care recipient, e.g. home emergency call with activity monitoring (e.g. easierLife), medication dispenser with acknowledgement function / alerting relatives if not taken, ...
  - yes: \_\_\_\_\_
  - no
2. Who has access to the technologies?
  - all
  - only chosen persons (private usage)
  - only chosen persons (*private + professional usage*)

### *documents*

1. shared document storage in the care network?
  - yes:
    - in paper form on the care recipient's premises
    - online (e.g. GoogleDrive, Microsoft OneNote / OneDrive, Dropbox)  
name of the application: \_\_\_\_\_
  - no
2. Who has access to the documents?
  - all
  - only chosen persons (private usage)
  - only chosen persons (*private + professional usage*)

### *messenger*

1. shared chat groups in the care network?
  - yes:
    - online (e.g. WhatsApp, Telegramm, Zoom, Threema)  
name of the application: \_\_\_\_\_
  - no
2. Who has access to the group?
  - all
  - only chosen persons (private usage)
  - only chosen persons (*private + professional usage*)

### *task lists*

1. shared task list in the care network?
  - yes:
    - in paper form at the care recipient's premises
    - online (e.g. WeDoIst, Google Tasks, Wunderlist)
  - no
2. Who has access to the list?
  - all
  - only chosen persons (private usage)
  - only chosen persons (*private + professional usage*)
