# Supplementary material for: Uncovering the Complexity of Care Networks – Towards a Taxonomy of Collaboration Complexity in Homecare
Source: Springer Nature journal article supplement (doi:10.1007/s10606-022-09433-8), 2022-06-08
Supplement: MOESM6 [file 23141948]

Supplementary Material: Appendix 6:

Article title:

## **Uncovering the Complexity of Care Networks – Towards a Taxonomy of Collaboration Complexity in Homecare**

Journal name: Computer Supported Cooperative Work

Authors:

Madeleine Renyi<sup>1,2</sup>, Petra Gaugisch<sup>3</sup>, Alexandra Hunck<sup>3</sup>, Stefan Strunck<sup>3</sup>, Christophe Kunze<sup>1</sup>, Frank Teuteberg<sup>2</sup>

<sup>1</sup>Technology and Inclusion Lab, Furtwangen University, Robert-Gerwig-Platz 1, 78120 Furtwangen, Germany  
{madeleine.renyi; christophe.kunze}@hs-furtwangen.de

<sup>2</sup>Institute for Information Management and Information Systems Engineering, Osnabrück University, Katharinenstr. 1, 49069 Osnabrück, Germany  
{mrenyi; frank.teuteberg}@uni-osnabrueck.de}

<sup>3</sup>Fraunhofer Institute for Industrial Engineering (IAO), Nobelstr. 12, 70569 Stuttgart, Germany  
{petra.gaugisch; stefan.strunck}@iao.fraunhofer.de  
alexandra.hunck@googlemail.com

### **Corresponding Author:**

Madeleine Renyi

Affiliation bound contact details:

Address: Robert-Gerwig-Platz 1, 78120 Furtwangen, Germany

Email: [madeleine.renyi@hs-furtwangen.de](mailto:madeleine.renyi@hs-furtwangen.de)

Permanent contact details:

Email: [info@madeleinerenyi.de](mailto:info@madeleinerenyi.de)

## Supplementary Material

Appendix 6:

Document Title: Communication and Collaboration card

Description: communication and collaboration particularities

### Communication and collaboration

preferred communication channel:

- personal
- telephone
- Fax
- E-Mail
- WhatsApp
- other: \_\_\_\_\_

frequency of communication:

- daily
- 2-3 times á week
- once weekly
- each second week
- monthly
- sporadic

content of communication:

- visits / psychosocial care (calls, conversations, ...)
- domestic care (e.g. shopping, cleaning, laundry, cooking)
- organization of nursing activities
- basic care / body care (e.g. washing, shaving, dressing, undressing)
- support with basic needs (e.g. going to toilet, food intake)
- craft activities (e.g. gardening, animal care)
- transport services e.g. to doctors or activities
- visiting service providers (e.g. supermarket, pharmacy)
- accompaniment to service providers (e.g. doctor, therapist, hairdresser)
- drug administration
- mobilization of the care recipient
- changing compression stockings, catheters, bandages
- other: \_\_\_\_\_

availability:

| Personal  |  |  |  |  |  |
|-----------|--|--|--|--|--|
| telephone |  |  |  |  |  |
| Fax       |  |  |  |  |  |
| E-Mail    |  |  |  |  |  |
| WhatsApp  |  |  |  |  |  |
| _____     |  |  |  |  |  |
| _____     |  |  |  |  |  |
| _____     |  |  |  |  |  |

current collaboration:

| tasks              |  |  |  |  |  |
|--------------------|--|--|--|--|--|
| appointments       |  |  |  |  |  |
| short term changes |  |  |  |  |  |
| regular exchange   |  |  |  |  |  |

known communication problems:

\_\_\_\_\_
