# Supplementary material for: Uncovering the Complexity of Care Networks – Towards a Taxonomy of Collaboration Complexity in Homecare
Source: Springer Nature journal article supplement (doi:10.1007/s10606-022-09433-8), 2022-06-08
Supplement: MOESM7 [file 23141948]

Supplementary Material: Appendix 7:

Article title:

## **Uncovering the Complexity of Care Networks – Towards a Taxonomy of Collaboration Complexity in Homecare**

Journal name: Computer Supported Cooperative Work

Authors:

Madeleine Renyi<sup>1,2</sup>, Petra Gaugisch<sup>3</sup>, Alexandra Hunck<sup>3</sup>, Stefan Strunck<sup>3</sup>, Christophe Kunze<sup>1</sup>, Frank Teuteberg<sup>2</sup>

<sup>1</sup>Technology and Inclusion Lab, Furtwangen University, Robert-Gerwig-Platz 1, 78120 Furtwangen, Germany  
{madeleine.renyi; christophe.kunze}@hs-furtwangen.de

<sup>2</sup>Institute for Information Management and Information Systems Engineering, Osnabrück University, Katharinenstr. 1, 49069 Osnabrück, Germany  
{mrenyi; frank.teuteberg}@uni-osnabrueck.de}

<sup>3</sup>Fraunhofer Institute for Industrial Engineering (IAO), Nobelstr. 12, 70569 Stuttgart, Germany  
{petra.gaugisch; stefan.strunck}@iao.fraunhofer.de  
alexandra.hunck@googlemail.com

### **Corresponding Author:**

Madeleine Renyi

Affiliation bound contact details:

Address: Robert-Gerwig-Platz 1, 78120 Furtwangen, Germany

Email: [madeleine.renyi@hs-furtwangen.de](mailto:madeleine.renyi@hs-furtwangen.de)

Permanent contact details:

Email: [info@madeleinerenyi.de](mailto:info@madeleinerenyi.de)

## Supplementary Material

### Appendix 7:

Document Title: Overview of survey participants ordered by their care network.

Description: Table lists the interviewees' characteristics, including age, caregiving role, and the number of caregivers in their network. Caregiving roles were delineated into three task fields: (1) hands-on nursing and support, (2) coordination and organization, and (3) visits and care.

## Appendix 7

Appendix 7 Table 1: Overview of survey participants ordered by their care network.

| network |                       | interviewee                                                                                                               |                                 |               |                    |
|---------|-----------------------|---------------------------------------------------------------------------------------------------------------------------|---------------------------------|---------------|--------------------|
| #       | number of care-givers | participants                                                                                                              | gender                          | age*          | tasks**            |
| 1       | 9                     | 1 caring relative<br>1 professional nurse<br>1 neighborhood manager <sup>1</sup>                                          | female<br>female<br>female      | B<br>B<br>B   | 1, 2, 3<br>1<br>2  |
| 2       | 9                     | 1 neighborhood helper <sup>2</sup><br>1 neighborhood help manager <sup>3</sup><br>2 nursing service managers <sup>4</sup> | female<br>female<br>male+female | B<br>B<br>B,B | 1<br>2<br>1, 2     |
| 3       | 5                     | 1 neighborhood helper<br>1 neighborhood help manager<br>1 nursing service manager                                         | female<br>female<br>male        | B<br>B<br>B   | 1<br>2<br>1, 2     |
| 4       | 8                     | 2 care service managers                                                                                                   | male+female                     | B,B           | 1, 2               |
| 5       | 4                     | 1 neighborhood helper<br>1 neighborhood help manager                                                                      | female<br>female                | B<br>B        | 1<br>2             |
| 6       | 6                     | 2 care service managers                                                                                                   | male+female                     | B,B           | 1, 2               |
| 7       | 11                    | 1 neighborhood helper<br>1 neighborhood help manager<br>2 nursing service managers                                        | female<br>female<br>male+female | B<br>B<br>B   | 1<br>2<br>1, 2     |
| 8       | 7                     | 2 care service managers                                                                                                   | male+female                     | B,B           | 1, 2               |
| 9       | 9                     | 1 caring relative                                                                                                         | female                          | A             | 1, 3               |
| 10      | 9                     | 1 caring relative                                                                                                         | female                          | B             | 1, 2, 3            |
| 11      | 7                     | 1 neighborhood helper                                                                                                     | female                          | B             | 1                  |
| 12      | 11                    | 1 caring relative                                                                                                         | female                          | B             | 1, 2               |
| 13      | 6                     | 1 caring relative                                                                                                         | female                          | B             | 1, 2               |
| 14      | 8                     | care recipient<br>1 caring relative                                                                                       | male<br>female                  | C<br>C        | -<br>1, 2, 3       |
| 15      | 13                    | 1 caring relative                                                                                                         | female                          | B             | 1, 2, 3            |
| 16      | 5                     | 1 caring relative <sup>***</sup><br>1 professional nurse                                                                  | female<br>female                | B<br>B        | 1, 2, 3<br>3       |
| 17      | 4                     | 1 caring relative <sup>***</sup><br>1 professional nurse                                                                  | female<br>female                | C<br>B        | 1, 2, 3<br>1, 2, 3 |
| 18      | 5                     | care recipient<br>1 professional nurse                                                                                    | female<br>female                | C<br>B        | 1, 2<br>2, 3       |
| 19      | 6                     | care recipient<br>1 professional nurse                                                                                    | male<br>female                  | B<br>B        | 1, 2<br>2, 3       |
| 20      | 12                    | 1 caring relative<br>1 neighborhood helper                                                                                | female<br>female                | B<br>B        | 1, 2, 3<br>1       |

<sup>1</sup> Neighborhood management is a part of urban development and usually acts as a link between residents and the municipality. Neighborhood management serves to integrate residents and to establish a sustainable resident organization.

<sup>2</sup> A neighborhood helper is a volunteer who is organized in a neighborhood association.

<sup>3</sup> A neighborhood help manager coordinates the volunteers of a neighborhood association. He/she acts as a broker between requests of help and volunteers.

<sup>4</sup> A nursing service manager coordinates the services of a nursing service provider. He/she acts as broker between requests for help and professional (nursing) staff.

|    |    |                                            |                  |        |           |
|----|----|--------------------------------------------|------------------|--------|-----------|
| 21 | 12 | 1 caring relative<br>1 neighborhood helper | female<br>female | B<br>B | 1, 3<br>1 |
|----|----|--------------------------------------------|------------------|--------|-----------|

\*) Age presented in aggregated age groups.

**A:** 0-30 years old

**B:** >30-70 years old

**C:** >70 years old

\*\*) Description of the task fields of the interviewee conducted in the care network.

**1:** hands-on nursing and support,

**2:** coordination and organization,

**3:** visits and care

\*\*\*) care recipient was present, but did not contribute to the interview
